# Supplementary material for: Identification of Pharmacophoric Fragments of DYRK1A Inhibitors Using Machine Learning Classification Models
Source: MDPI journal article supplement (doi:10.3390/molecules27061753), 2022-03-08
Supplement: s1 [file s1]

# Identification of Pharmacophoric Fragments of DYRK1A Inhibitors using Machine Learning Classification Models

Mengzhou Bi <sup>1,†</sup>, Zhen Guan <sup>2,†</sup>, Tengjiao Fan <sup>1,3</sup>, Na Zhang <sup>1,\*</sup>, Jianhua Wang <sup>2,\*</sup>, Guohui Sun <sup>1</sup>, Lijiao Zhao <sup>1</sup> and Rugang Zhong <sup>1</sup>

<sup>1</sup> Key Laboratory of Environmental and Viral Oncology, College of Life Science and Chemistry, Faculty of Environment and Life, Beijing University of Technology, Beijing 100124, China; bimengzhou@emails.bjut.edu.cn (M.B.); fannie818@126.com (T.F.); sunguohui@bjut.edu.cn (G.S.); zhaolijiao@bjut.edu.cn (L.Z.); lifesci@bjut.edu.cn (R.Z.)

<sup>2</sup> Beijing Municipal Key Laboratory of Child Development and Nutriomics, Translational Medicine Laboratory, Capital Institute of Pediatrics, Beijing 100020, China; mengai518@126.com

<sup>3</sup> Department of Medical Technology, Beijing Pharmaceutical University of Staff and Workers, Beijing 100079, China

\* Correspondence: nanatonglei@bjut.edu.cn (N.Z.); wangjianhua@shouer.com.cn(J.W.)

† These authors contributed equally to this paper.

**Table S1.** Structure and activity of DYRK1A inhibitors of the training and test set.

| No. | R <sub>1</sub> | R <sub>2</sub>    | R <sub>3</sub> | R <sub>4</sub> | R <sub>5</sub> | IC <sub>50</sub><br>(μM) | P/N |
|-----|----------------|-------------------|----------------|----------------|----------------|--------------------------|-----|
| 1   | H              | -OCH <sub>3</sub> | H              | H              |                | 0.056                    | P   |
| 2*  | H              | -OCH <sub>3</sub> | H              | H              |                | 0.145                    | P   |
| 3*  | H              | -OCH <sub>3</sub> | H              | H              |                | 0.153                    | P   |
| 4   | H              | -OCH <sub>3</sub> | H              | H              |                | 0.065                    | P   |

|    |                                                                                     |                   |   |   |                                                                                       |        |   |
|----|-------------------------------------------------------------------------------------|-------------------|---|---|---------------------------------------------------------------------------------------|--------|---|
| 5  | H                                                                                   | -OCH <sub>3</sub> | H | H | 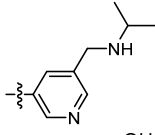   | 0.375  | P |
| 6  | H                                                                                   | -OCH <sub>3</sub> | H | H |    | 0.208  | P |
| 7  | H                                                                                   | -OCH <sub>3</sub> | H | H |    | 0.162  | P |
| 8  | H                                                                                   | -F                | H | H |    | 5.64   | N |
| 9  | H                                                                                   | -F                | H | H |    | 3.68   | N |
| 10 | H                                                                                   | -OH               | H | H |    | 0.28   | P |
| 11 | H                                                                                   | -OCH <sub>3</sub> | H | H |   | 0.26   | P |
| 12 | H                                                                                   | -OCH <sub>3</sub> | H | H |  | 0.04   | P |
| 13 | H                                                                                   | -OCH <sub>3</sub> | H | H |  | 0.491  | P |
| 14 | H                                                                                   | -OCH <sub>3</sub> | H | H |  | 0.207  | P |
| 15 |  |                   | H | H |  | 0.644  | P |
| 16 | H                                                                                   | -OCH <sub>3</sub> | H | H |  | 0.33   | P |
| 17 | H                                                                                   | -OCH <sub>3</sub> | H | H |  | 0.0437 | P |

|     |   |                                                                                   |   |   |                                                                                       |        |   |
|-----|---|-----------------------------------------------------------------------------------|---|---|---------------------------------------------------------------------------------------|--------|---|
| 18  | H | -OCH <sub>3</sub>                                                                 | H | H | 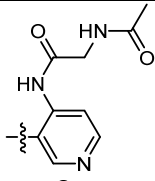   | 0.281  | P |
| 19  | H |  | H | H |    | 0.593  | P |
| 20  | H | -OCH <sub>3</sub>                                                                 | H | H |    | 5.42   | N |
| 21* | H | -OCH <sub>3</sub>                                                                 | H | H |    | 0.175  | P |
| 22* | H | -OCH <sub>3</sub>                                                                 | H | H |    | 0.922  | P |
| 23  | H | -OCH <sub>3</sub>                                                                 | H | H |   | 0.15   | P |
| 24* | H | -OCH <sub>3</sub>                                                                 | H | H |  | 0.0938 | P |
| 25  | H | -OCH <sub>3</sub>                                                                 | H | H |  | 0.0518 | P |
| 26  | H | -OCH <sub>3</sub>                                                                 | H | H |  | 0.35   | P |
| 27  | H | -OCH <sub>3</sub>                                                                 | H | H |  | 0.644  | P |
| 28  | H | -OCH <sub>3</sub>                                                                 | H | H |  | 0.171  | P |
| 29  | H | -CN                                                                               | H | H |  | 0.487  | P |

|     |   |                                                                                     |   |   |                                                                                       |        |   |
|-----|---|-------------------------------------------------------------------------------------|---|---|---------------------------------------------------------------------------------------|--------|---|
| 30  | H | -OCH <sub>3</sub>                                                                   | H | H | 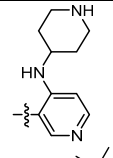   | 0.637  | P |
| 31* | H | -OCH <sub>3</sub>                                                                   | H | H |    | 0.789  | P |
| 32  | H | -OCH <sub>3</sub>                                                                   | H | H |    | 0.351  | P |
| 33* | H | -OCH <sub>3</sub>                                                                   | H | H |    | 3.86   | P |
| 34  | H | -OCH <sub>3</sub>                                                                   | H | H |   | 0.808  | P |
| 35  | H | -OCH <sub>3</sub>                                                                   | H | H |  | 0.413  | P |
| 36  | H | -OCH <sub>3</sub>                                                                   | H | H |  | 0.534  | P |
| 37  | H | -OH                                                                                 | H | H |  | 0.658  | P |
| 38* | H |  | H | H |  | 0.0774 | P |
| 39  | H | -OCH <sub>3</sub>                                                                   | H | H |  | 0.488  | P |
| 40  | H | -OCH <sub>3</sub>                                                                   | H | H |  | 0.273  | P |
| 41  | H | -OCH <sub>3</sub>                                                                   | H | H |  | 0.236  | P |

|     |                   |                   |                   |   |                                                                                       |       |   |
|-----|-------------------|-------------------|-------------------|---|---------------------------------------------------------------------------------------|-------|---|
| 42  | H                 | -OCH <sub>3</sub> | H                 | H | 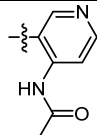   | 0.247 | P |
| 43  | H                 | -OCH <sub>3</sub> | H                 | H |    | 0.337 | P |
| 44  | H                 | -OCH <sub>3</sub> | H                 | H |    | 0.904 | P |
| 45  | H                 | -OCH <sub>3</sub> | H                 | H |    | 0.306 | P |
| 46  | H                 | H                 | -OH               | H |    | 28.1  | N |
| 47  | H                 | -OH               | H                 | H |   | 0.8   | P |
| 48  | -OH               | H                 | H                 | H |  | 35    | N |
| 49  | H                 | H                 | -OCH <sub>3</sub> | H |  | 12.3  | N |
| 50  | H                 | -OCH <sub>3</sub> | H                 | H |  | 0.4   | P |
| 51  | -OCH <sub>3</sub> | H                 | H                 | H |  | 10.5  | N |
| 52* | H                 | H                 | -F                | H |  | 23.6  | N |
| 53* | H                 | -F                | H                 | H |  | 3.9   | N |
| 54  | H                 | H                 | -Br               | H |  | 2.3   | N |
| 55  | H                 | -Br               | H                 | H |  | 1.1   | N |
| 56  | H                 | H                 | -Cl               | H |  | 2.9   | N |
| 57  | H                 | H                 | -CF <sub>3</sub>  | H |  | 1.1   | N |
| 58  | H                 | -CF <sub>3</sub>  | H                 | H |  | 26.5  | N |
| 59  | H                 | H                 | -CN               | H |  | 1.3   | N |

|     |                                                                                     |                                                                                     |                                                                                   |   |                                                                                     |        |   |
|-----|-------------------------------------------------------------------------------------|-------------------------------------------------------------------------------------|-----------------------------------------------------------------------------------|---|-------------------------------------------------------------------------------------|--------|---|
| 60* | H                                                                                   | H                                                                                   |  | H |  | 15.7   | N |
| 61* | H                                                                                   | H                                                                                   | -OCF <sub>3</sub>                                                                 | H |  | 3.2    | N |
| 62  | H                                                                                   | H                                                                                   | CH <sub>3</sub>                                                                   | H |  | 7.3    | N |
| 63  | H                                                                                   | CH <sub>3</sub>                                                                     | H                                                                                 | H |  | 29.3   | N |
| 64* | H                                                                                   | H                                                                                   | H                                                                                 | H |  | 36     | N |
| 65  | H                                                                                   |    | /                                                                                 | / | /                                                                                   | 0.043  | P |
| 66  | H                                                                                   |    | /                                                                                 | / | /                                                                                   | 0.109  | P |
| 67  | H                                                                                   |    | /                                                                                 | / | /                                                                                   | 0.272  | P |
| 68  | H                                                                                   |   | /                                                                                 | / | /                                                                                   | 0.315  | P |
| 69  | H                                                                                   |  | /                                                                                 | / | /                                                                                   | 0.0352 | P |
| 70  | H                                                                                   |  | /                                                                                 | / | /                                                                                   | 0.106  | P |
| 71  | H                                                                                   |  | /                                                                                 | / | /                                                                                   | 0.013  | P |
| 72* | -NH <sub>2</sub>                                                                    |  | /                                                                                 | / | /                                                                                   | 0.0167 | P |
| 73  |  |  | /                                                                                 | / | /                                                                                   | 0.301  | P |
| 74  |  |  | /                                                                                 | / | /                                                                                   | 0.015  | P |
| 75* |  |  | /                                                                                 | / | /                                                                                   | 0.0171 | P |
| 76* |  |  | /                                                                                 | / | /                                                                                   | 0.0116 | P |
| 77  |  |  | /                                                                                 | / | /                                                                                   | 0.0245 | P |
| 78  |  |  | /                                                                                 | / | /                                                                                   | 0.0433 | P |

|      |                                                                                   |                                                                                   |     |                                                                                     |     |        |   |
|------|-----------------------------------------------------------------------------------|-----------------------------------------------------------------------------------|-----|-------------------------------------------------------------------------------------|-----|--------|---|
| 80*  | 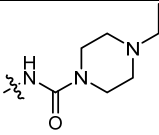 |  | /   | /                                                                                   | /   | 0.0062 | P |
| 81   |  | H                                                                                 | /   | /                                                                                   | /   | 0.216  | P |
| 82   | H                                                                                 | -NH <sub>2</sub>                                                                  | /   | /                                                                                   | /   | 0.329  | P |
| 83*  |  | H                                                                                 | H   | H                                                                                   | /   | 0.6    | P |
| 84   |  | H                                                                                 | H   | H                                                                                   | /   | 0.64   | P |
| 85   |  | H                                                                                 | H   | H                                                                                   | /   | 0.58   | P |
| 86   |  | H                                                                                 | H   | -CH <sub>3</sub>                                                                    | /   | 0.9    | P |
| 87*  | -I                                                                                | H                                                                                 | H   | -CH <sub>3</sub>                                                                    | /   | 0.4    | P |
| 88*  | H                                                                                 | H                                                                                 | -Br | H                                                                                   | /   | 0.068  | P |
| 89   | -I                                                                                | -Br                                                                               | H   | H                                                                                   | /   | 0.034  | P |
| 90   | -I                                                                                | H                                                                                 | -Br | H                                                                                   | /   | 0.039  | P |
| 91   | -I                                                                                | H                                                                                 | H   | H                                                                                   | /   | 0.066  | P |
| 92   | -OH                                                                               | H                                                                                 | H   |   | H   | 0.34   | P |
| 93*  | H                                                                                 | -OH                                                                               | H   |  | H   | 0.54   | P |
| 95   | H                                                                                 | -OH                                                                               | H   |  | H   | 0.3    | P |
| 96   | H                                                                                 | -CN                                                                               | H   |  | H   | 1.6    | N |
| 97   | H                                                                                 | -OH                                                                               | H   |  | H   | 0.35   | P |
| 98*  | -OH                                                                               | H                                                                                 | H   |  | H   | 0.23   | P |
| 99   | H                                                                                 | H                                                                                 | -Cl | H                                                                                   | -CN | 3.3    | N |
| 100* | H                                                                                 | H                                                                                 | -Br | H                                                                                   | -CN | 1.1    | N |

|      |   |   |     |                                                                                     |     |       |   |
|------|---|---|-----|-------------------------------------------------------------------------------------|-----|-------|---|
| 101  | H | H | -I  | H                                                                                   | -CN | 0.41  | P |
| 102  | H | H | H   | 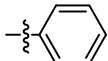   | -CN | 0.4   | P |
| 103* | H | H | -Cl |    | -CN | 0.04  | P |
| 104* | H | H | -Br |    | -CN | 0.025 | P |
| 105  | H | H | -I  |    | -CN | 0.01  | P |
| 106* | H | H | -Cl |    | -CN | 0.69  | P |
| 107* | H | H | -Cl |    | -CN | 3.9   | N |
| 108  | H | H | -I  |    | -CN | 0.233 | P |
| 109  | H | H | -I  |    | -CN | 0.21  | P |
| 110* | H | H | -I  |    | -CN | 0.08  | P |
| 111  | H | H | -I  |    | -CN | 0.28  | P |
| 112  | H | H | -I  |   | -CN | 0.14  | P |
| 113  | H | H | -I  |  | -CN | 0.07  | P |
| 114  | H | H | -Br | H                                                                                   | -CN | 1.9   | N |
| 115  | H | H | -Br |  | -CN | 2.3   | N |
| 116  | H | H | -I  |  | -CN | 0.65  | P |
| 117* | H | H | -Cl |  | -CN | 2     | N |

1'''' is a test set of 29 compounds randomly selected.



**Table S2.** Structure and activity of DYRK1A inhibitors for the external validation set.

| No. | Com.                                                                                | IC <sub>50</sub> (μM) | P/N |
|-----|-------------------------------------------------------------------------------------|-----------------------|-----|
| 118 |    | 128                   | N   |
| 119 |    | 0.068                 | P   |
| 120 |    | 0.014                 | P   |
| 121 |    | >10                   | N   |
| 122 |    | 0.08                  | P   |
| 123 |   | 0.032                 | P   |
| 124 |  | 0.08                  | P   |
| 125 |  | 0.21                  | P   |
| 126 |  | 5                     | N   |
| 127 |  | 2.9                   | N   |
| 128 |  | 0.091                 | P   |
| 129 |  | 0.006                 | P   |

130

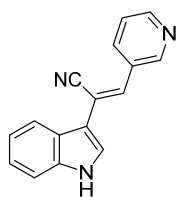

5.5

N

131

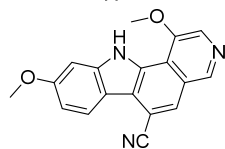

0.018

P

132

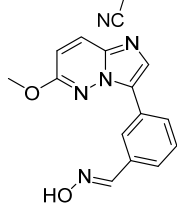

0.033

P

---

**Table S3.** Performance of 35 classification models for the training set and test set.

| Data set     |           | Model               | AUC   | CA    | MCC   | TP | TN | FP | FN | SE    | SP    |
|--------------|-----------|---------------------|-------|-------|-------|----|----|----|----|-------|-------|
| Training set | Ext FP    | SVM                 | 0.580 | 0.773 | 0.449 | 58 | 6  | 13 | 1  | 0.983 | 0.316 |
|              |           | Neural Network      | 0.631 | 0.727 | 0.163 | 58 | 6  | 13 | 11 | 0.841 | 0.316 |
|              |           | kNN                 | 0.660 | 0.739 | 0.113 | 61 | 4  | 15 | 8  | 0.884 | 0.211 |
|              |           | Naïve Bayes         | 0.663 | 0.659 | 0.280 | 45 | 13 | 6  | 24 | 0.652 | 0.684 |
|              |           | Random Forest       | 0.693 | 0.750 | 0.171 | 61 | 5  | 14 | 8  | 0.884 | 0.263 |
|              |           | Logistic Regression | 0.676 | 0.727 | 0.163 | 58 | 6  | 13 | 11 | 0.841 | 0.316 |
|              |           | Tree                | 0.626 | 0.716 | 0.145 | 57 | 6  | 13 | 12 | 0.826 | 0.316 |
| Training set | EState FP | SVM                 | 0.883 | 0.852 | 0.508 | 67 | 8  | 11 | 2  | 0.971 | 0.421 |
|              |           | Neural Network      | 0.893 | 0.852 | 0.556 | 63 | 12 | 7  | 6  | 0.913 | 0.632 |
|              |           | kNN                 | 0.820 | 0.852 | 0.516 | 66 | 9  | 10 | 3  | 0.957 | 0.474 |
|              |           | Naïve Bayes         | 0.846 | 0.750 | 0.396 | 53 | 13 | 6  | 16 | 0.768 | 0.684 |
|              |           | Random Forest       | 0.882 | 0.852 | 0.540 | 64 | 11 | 8  | 5  | 0.928 | 0.579 |
|              |           | Logistic Regression | 0.882 | 0.852 | 0.540 | 64 | 11 | 8  | 5  | 0.928 | 0.579 |
|              |           | Tree                | 0.843 | 0.83  | 0.547 | 59 | 14 | 5  | 10 | 0.855 | 0.737 |
| Training set | MACCS FP  | SVM                 | 0.879 | 0.898 | 0.678 | 67 | 12 | 7  | 2  | 0.971 | 0.632 |
|              |           | Neural Network      | 0.872 | 0.886 | 0.653 | 65 | 13 | 6  | 4  | 0.942 | 0.684 |
|              |           | kNN                 | 0.865 | 0.898 | 0.684 | 66 | 13 | 6  | 3  | 0.957 | 0.684 |
|              |           | Naïve Bayes         | 0.857 | 0.716 | 0.406 | 48 | 15 | 4  | 21 | 0.696 | 0.790 |
|              |           | Random Forest       | 0.900 | 0.898 | 0.678 | 67 | 12 | 7  | 2  | 0.971 | 0.632 |
|              |           | Logistic Regression | 0.875 | 0.875 | 0.624 | 64 | 13 | 6  | 5  | 0.928 | 0.684 |
|              |           | Tree                | 0.835 | 0.875 | 0.612 | 65 | 12 | 7  | 4  | 0.942 | 0.632 |
| Training set | PubChemFP | SVM                 | 0.933 | 0.909 | 0.717 | 67 | 13 | 6  | 2  | 0.971 | 0.684 |
|              |           | Neural Network      | 0.893 | 0.909 | 0.743 | 64 | 16 | 3  | 5  | 0.928 | 0.842 |
|              |           | kNN                 | 0.861 | 0.861 | 0.612 | 65 | 12 | 7  | 4  | 0.942 | 0.632 |
|              |           | Naïve Bayes         | 0.908 | 0.807 | 0.508 | 57 | 14 | 5  | 12 | 0.826 | 0.737 |
|              |           | Random Forest       | 0.908 | 0.920 | 0.753 | 68 | 13 | 6  | 1  | 0.986 | 0.684 |
|              |           | Logistic Regression | 0.904 | 0.920 | 0.755 | 67 | 14 | 5  | 2  | 0.971 | 0.737 |
|              |           | Tree                | 0.754 | 0.864 | 0.583 | 64 | 12 | 7  | 5  | 0.928 | 0.632 |
| Training set | Sub FP    | SVM                 | 0.886 | 0.852 | 0.515 | 69 | 6  | 13 | 0  | 1.000 | 0.316 |
|              |           | Neural Network      | 0.908 | 0.841 | 0.530 | 62 | 12 | 7  | 7  | 0.899 | 0.632 |
|              |           | kNN                 | 0.862 | 0.830 | 0.435 | 65 | 8  | 11 | 4  | 0.942 | 0.421 |
|              |           | Naïve Bayes         | 0.875 | 0.773 | 0.455 | 54 | 14 | 5  | 15 | 0.783 | 0.737 |
|              |           | Random Forest       | 0.88  | 0.841 | 0.513 | 63 | 11 | 8  | 6  | 0.913 | 0.579 |
|              |           | Logistic Regression | 0.914 | 0.864 | 0.583 | 64 | 12 | 7  | 5  | 0.928 | 0.632 |
|              |           | Tree                | 0.896 | 0.875 | 0.638 | 63 | 14 | 5  | 6  | 0.913 | 0.737 |
| Test set     | Ext FP    | SVM                 | 0.622 | 0.724 | 0.262 | 19 | 2  | 7  | 1  | 0.950 | 0.222 |
|              |           | Neural Network      | 0.833 | 0.724 | 0.286 | 18 | 3  | 6  | 2  | 0.900 | 0.333 |
|              |           | kNN                 | 0.731 | 0.759 | 0.380 | 19 | 3  | 6  | 1  | 0.950 | 0.333 |
|              |           | Naïve Bayes         | 0.772 | 0.690 | 0.344 | 14 | 6  | 3  | 6  | 0.700 | 0.667 |
|              |           | Random Forest       | 0.767 | 0.759 | 0.380 | 19 | 3  | 6  | 1  | 0.950 | 0.333 |
|              |           | Logistic Regression | 0.800 | 0.759 | 0.380 | 19 | 3  | 6  | 1  | 0.950 | 0.333 |
|              |           | Tree                | 0.703 | 0.759 | 0.393 | 18 | 4  | 5  | 2  | 0.900 | 0.444 |
| Test set     | EState FP | SVM                 | 0.892 | 0.724 | 0.318 | 17 | 4  | 5  | 3  | 0.850 | 0.444 |
|              |           | Neural Network      | 0.858 | 0.793 | 0.517 | 17 | 6  | 3  | 3  | 0.850 | 0.667 |
|              |           | kNN                 | 0.894 | 0.828 | 0.596 | 20 | 4  | 5  | 0  | 1.000 | 0.444 |
|              |           | Naïve Bayes         | 0.786 | 0.793 | 0.517 | 17 | 6  | 3  | 3  | 0.850 | 0.667 |
|              |           | Random Forest       | 0.903 | 0.759 | 0.393 | 18 | 4  | 5  | 2  | 0.900 | 0.444 |
|              |           | Logistic Regression | 0.831 | 0.828 | 0.587 | 18 | 6  | 3  | 2  | 0.900 | 0.667 |

|          |           |                     |       |       |       |    |   |   |   |       |       |
|----------|-----------|---------------------|-------|-------|-------|----|---|---|---|-------|-------|
| Test set | MACCS FP  | Tree                | 0.731 | 0.759 | 0.393 | 18 | 4 | 5 | 2 | 0.900 | 0.444 |
|          |           | SVM                 | 0.906 | 0.862 | 0.680 | 20 | 5 | 4 | 0 | 1.000 | 0.556 |
|          |           | Neural Network      | 0.911 | 0.862 | 0.678 | 18 | 7 | 2 | 2 | 0.900 | 0.778 |
|          |           | kNN                 | 0.856 | 0.862 | 0.680 | 20 | 5 | 4 | 0 | 1.000 | 0.556 |
|          |           | Naïve Bayes         | 0.822 | 0.759 | 0.454 | 16 | 6 | 3 | 4 | 0.800 | 0.667 |
|          |           | Random Forest       | 0.922 | 0.862 | 0.680 | 20 | 5 | 4 | 0 | 1.000 | 0.556 |
|          |           | Logistic Regression | 0.906 | 0.897 | 0.753 | 19 | 7 | 2 | 1 | 0.950 | 0.778 |
|          |           | Tree                | 0.933 | 0.862 | 0.680 | 20 | 5 | 4 | 0 | 1.000 | 0.556 |
| Test set | PubChemFP | SVM                 | 0.911 | 0.862 | 0.705 | 17 | 8 | 1 | 3 | 0.850 | 0.889 |
|          |           | Neural Network      | 0.911 | 0.862 | 0.705 | 17 | 8 | 1 | 3 | 0.850 | 0.889 |
|          |           | kNN                 | 0.872 | 0.897 | 0.761 | 20 | 6 | 3 | 0 | 1.000 | 0.667 |
|          |           | Naïve Bayes         | 0.881 | 0.828 | 0.647 | 16 | 8 | 1 | 4 | 0.800 | 0.889 |
|          |           | Random Forest       | 0.917 | 0.897 | 0.761 | 20 | 6 | 3 | 0 | 1.000 | 0.667 |
|          |           | Logistic Regression | 0.944 | 0.862 | 0.705 | 17 | 8 | 1 | 3 | 0.850 | 0.889 |
|          |           | Tree                | 0.878 | 0.828 | 0.647 | 16 | 8 | 1 | 4 | 0.800 | 0.889 |
| Test set | Sub FP    | SVM                 | 0.858 | 0.759 | 0.393 | 18 | 4 | 5 | 2 | 0.900 | 0.444 |
|          |           | Neural Network      | 0.881 | 0.793 | 0.517 | 17 | 6 | 3 | 3 | 0.850 | 0.667 |
|          |           | kNN                 | 0.853 | 0.862 | 0.680 | 20 | 5 | 4 | 0 | 1.000 | 0.556 |
|          |           | Naïve Bayes         | 0.892 | 0.759 | 0.496 | 15 | 7 | 2 | 5 | 0.750 | 0.778 |
|          |           | Random Forest       | 0.850 | 0.828 | 0.577 | 19 | 5 | 4 | 1 | 0.950 | 0.556 |
|          |           | Logistic Regression | 0.903 | 0.793 | 0.493 | 18 | 5 | 4 | 2 | 0.900 | 0.556 |
|          |           | Tree                | 0.825 | 0.862 | 0.517 | 17 | 6 | 3 | 3 | 0.850 | 0.667 |

**Table S4.** PubChem fingerprints of inhibitors (16) and non-inhibitors (10) responsible for DYR1KA modulation/inhibition.

| Fingerprints | Substructure                                               | General Sub-structure                                                               | Representative Substructure                                                          | IG    | FP        | FN       |
|--------------|------------------------------------------------------------|-------------------------------------------------------------------------------------|--------------------------------------------------------------------------------------|-------|-----------|----------|
| PubchemFP187 | ≥2 saturated or aromatic nitrogen-containing ring size 6   |  |  | 0.088 | 1.315(23) | 0(0)     |
| PubchemFP188 | ≥2 saturated or aromatic heteroatom-containing ring size 6 |  |  | 0.088 | 1.315(23) | 0(0)     |
| PubchemFP260 | ≥3 hetero-aromatic rings                                   |  |  | 0.067 | 1.292(18) | 0(0)     |
| PubchemFP646 | O=C-N-C-[#1]                                               |  |  | 0.063 | 1.315(17) | 0(0)     |
| PubchemFP645 | O=C-N-C-C                                                  |  |  | 0.053 | 1.230(29) | 0.270(2) |

|              |                       |                                                                                     |                                                                                      |       |           |          |
|--------------|-----------------------|-------------------------------------------------------------------------------------|--------------------------------------------------------------------------------------|-------|-----------|----------|
| PubchemFP499 | N-C:C:N               |                                                                                     | 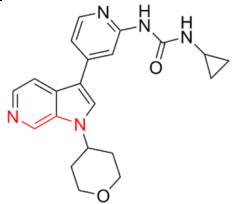   | 0.064 | 1.237(32) | 0.246(2) |
| PubchemFP547 | N-C:C:N               |                                                                                     |                                                                                      | 0.064 | 1.237(32) | 0.246(2) |
| PubchemFP569 | N-C-C-N               |    |                                                                                      | 0.060 | 1.213(36) | 0.321(3) |
| PubchemFP611 | N-C-C-N-C             |                                                                                     |                                                                                      | 0.060 | 1.213(36) | 0.321(3) |
| PubchemFP629 | S-C:C:C-N             |    |    | 0.062 | 1.198(41) | 0.371(4) |
| PubchemFP658 | C-C-S-C-C             |    |    | 0.062 | 1.198(41) | 0.371(4) |
| PubchemFP691 | O-C-C-C-C-C-N         |    |                                                                                      | 0.144 | 1.263(49) | 0.164(2) |
| PubchemFP702 | O-C-C-C-C-C-N-C       |                                                                                     |    | 0.144 | 1.263(49) | 0.164(2) |
| PubchemFP703 | O-C-C-C-C-C(N)-C      |                                                                                     |                                                                                      | 0.139 | 1.262(48) | 0.167(2) |
| PubchemFP720 | Oc1ccc(S)cc1          |                                                                                     |                                                                                      | 0.103 | 1.253(41) | 0.194(2) |
| PubchemFP783 | OC1CCC(S)CC1          |    |    | 0.103 | 1.253(41) | 0.194(2) |
| PubchemFP24  | $\geq 2F$             |                                                                                     |                                                                                      | 0     | 0(0)      | 4.179(3) |
| PubchemFP363 | C(~F)(~F)             |  |  | 0     | 0(0)      | 4.179(3) |
| PubchemFP716 | Cc1ccc(N)cc1          |  |  | 0     | 0(0)      | 4.179(4) |
| PubchemFP505 | Cl-C:C-O              |                                                                                     |                                                                                      | 0     | 0(0)      | 4.179(1) |
| PubchemFP583 | Cl-C:C-O-C            |  |                                                                                      | 0     | 0(0)      | 4.179(1) |
| PubchemFP827 | OC1C(Cl)CCC<br>C1     |  |  | 0     | 0(0)      | 4.179(1) |
| PubchemFP347 | C(~C)(~H)(~O)<br>(~O) |                                                                                     |  | 0     | 0(0)      | 4.179(1) |
| PubchemFP367 | C(~H)(~O)(~O)         |                                                                                     |                                                                                      | 0     | 0(0)      | 4.179(1) |
| PubchemFP727 | Sc1ccc(Br)cc1         |                                                                                     |                                                                                      | 0     | 0(0)      | 4.179(1) |
| PubchemFP811 | SC1CC(Br)CCC1         |                                                                                     |  | 0     | 0(0)      | 4.179(1) |
